# Supplementary material for: Clinical trials in a COVID-19 pandemic: Shared infrastructure for continuous learning in a rapidly changing landscape
Source: PubMed Central journal article supplement (PMC8172421; doi:10.1177/1740774520988298), 2021-02-03
Supplement: NIHMS1658305-supplement-1.pdf [file NIHMS1658305-supplement-1.pdf]

**Table S1. Elements of Shared Infrastructure**

| <b>Element</b>                                    | <b>Description</b>                                                                                                                                                        |
|---------------------------------------------------|---------------------------------------------------------------------------------------------------------------------------------------------------------------------------|
| COVID Endpoint Registry                           | Registry of all primary endpoints considered for trials in the US pending or granted IRB-approval                                                                         |
| COVID DSMB Registry                               | International registry of 1) DSMB members available for COVID studies and of 2) individuals willing to support DSMBs as the independent statistician or statistical group |
| Charters                                          | Charters for DSMBs and Steering Committees with text addressing issues unique to COVID                                                                                    |
| Standard Operating Procedures                     | Documents describing procedures related to DSMB coordination, blinding, randomization, data management, and database lock                                                 |
| Statistical Analysis Plans (SAPs)                 | A standardized analytic plan for analysis with common data elements that allow for merging of data requiring variables to be uniform and similarly ascertained            |
| Database Capture and Electronic Case Report Forms | Shared data elements and standardized capture of variables                                                                                                                |
| Design and Analysis Team Dedicated to COVID       | A team devoted to COVID-related studies familiar with issues unique to COVID, endpoints used and sources of variation in data generated                                   |
| Platform Protocol                                 | A protocol that enables the simultaneous evaluation of multiple agents or combinations of agents for the same disease and study population                                |

**Figure S1. Number of registered experts by area of expertise**

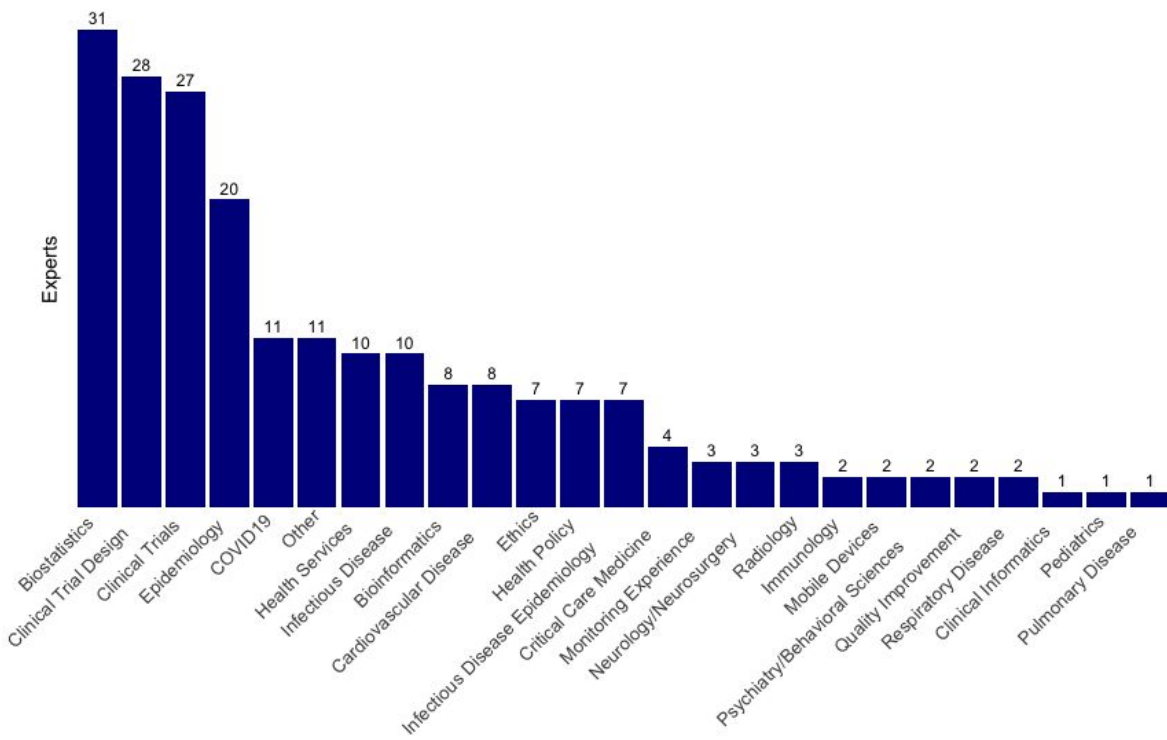

*Note: Experts can indicate multiple areas of expertise*

Clinical trials in a COVID-19 Pandemic: shared infrastructure for continuous learning in a rapidly changing landscape

|                                                                                                                                                                                                                                                                                                                                |                                                                                                                                                                                                                                                                                                                                                                                                                                                                                                                                                                                                                                                                                                                                                                                                                                                                                                                                                                                                                                                                                                                                                                                                                                                                                                                                                                                                                                                                                                                                                                                                                                                                                                                                                                                                                                                                                                                                                                                                                                                                                                                                                                                                                                                                                                                                                                                                                                                                                                                                                                                                                                                                                                                                                                                                                                                                                                                                                                                                                                                                                                                                                                                                                                                                                                                                                    |                                                                                                                                          |                                                                                                                                                                                                     |                                                                                                                                              |                                                                                                                                                                                                    |                                                                                                                                            |                                                                                                                                                                                                     |                                                                                                                                         |                                                                                                                                                                                                                                   |                                                                                                                                                 |                                                                                                                                                                         |                                                                                                                                                                                                                                                                                                                                |                                                                                                                                                                                                     |                                                                                                                                                      |                                                                                                                                                                                                     |
|--------------------------------------------------------------------------------------------------------------------------------------------------------------------------------------------------------------------------------------------------------------------------------------------------------------------------------|----------------------------------------------------------------------------------------------------------------------------------------------------------------------------------------------------------------------------------------------------------------------------------------------------------------------------------------------------------------------------------------------------------------------------------------------------------------------------------------------------------------------------------------------------------------------------------------------------------------------------------------------------------------------------------------------------------------------------------------------------------------------------------------------------------------------------------------------------------------------------------------------------------------------------------------------------------------------------------------------------------------------------------------------------------------------------------------------------------------------------------------------------------------------------------------------------------------------------------------------------------------------------------------------------------------------------------------------------------------------------------------------------------------------------------------------------------------------------------------------------------------------------------------------------------------------------------------------------------------------------------------------------------------------------------------------------------------------------------------------------------------------------------------------------------------------------------------------------------------------------------------------------------------------------------------------------------------------------------------------------------------------------------------------------------------------------------------------------------------------------------------------------------------------------------------------------------------------------------------------------------------------------------------------------------------------------------------------------------------------------------------------------------------------------------------------------------------------------------------------------------------------------------------------------------------------------------------------------------------------------------------------------------------------------------------------------------------------------------------------------------------------------------------------------------------------------------------------------------------------------------------------------------------------------------------------------------------------------------------------------------------------------------------------------------------------------------------------------------------------------------------------------------------------------------------------------------------------------------------------------------------------------------------------------------------------------------------------------|------------------------------------------------------------------------------------------------------------------------------------------|-----------------------------------------------------------------------------------------------------------------------------------------------------------------------------------------------------|----------------------------------------------------------------------------------------------------------------------------------------------|----------------------------------------------------------------------------------------------------------------------------------------------------------------------------------------------------|--------------------------------------------------------------------------------------------------------------------------------------------|-----------------------------------------------------------------------------------------------------------------------------------------------------------------------------------------------------|-----------------------------------------------------------------------------------------------------------------------------------------|-----------------------------------------------------------------------------------------------------------------------------------------------------------------------------------------------------------------------------------|-------------------------------------------------------------------------------------------------------------------------------------------------|-------------------------------------------------------------------------------------------------------------------------------------------------------------------------|--------------------------------------------------------------------------------------------------------------------------------------------------------------------------------------------------------------------------------------------------------------------------------------------------------------------------------|-----------------------------------------------------------------------------------------------------------------------------------------------------------------------------------------------------|------------------------------------------------------------------------------------------------------------------------------------------------------|-----------------------------------------------------------------------------------------------------------------------------------------------------------------------------------------------------|
| Manuscript ID:                                                                                                                                                                                                                                                                                                                 | CT-20-0297.R3                                                                                                                                                                                                                                                                                                                                                                                                                                                                                                                                                                                                                                                                                                                                                                                                                                                                                                                                                                                                                                                                                                                                                                                                                                                                                                                                                                                                                                                                                                                                                                                                                                                                                                                                                                                                                                                                                                                                                                                                                                                                                                                                                                                                                                                                                                                                                                                                                                                                                                                                                                                                                                                                                                                                                                                                                                                                                                                                                                                                                                                                                                                                                                                                                                                                                                                                      |                                                                                                                                          |                                                                                                                                                                                                     |                                                                                                                                              |                                                                                                                                                                                                    |                                                                                                                                            |                                                                                                                                                                                                     |                                                                                                                                         |                                                                                                                                                                                                                                   |                                                                                                                                                 |                                                                                                                                                                         |                                                                                                                                                                                                                                                                                                                                |                                                                                                                                                                                                     |                                                                                                                                                      |                                                                                                                                                                                                     |
| Funding Information:                                                                                                                                                                                                                                                                                                           | <b>National Institute of Health</b> ✕<br>P30-CA124435<br>P30-DK116074<br>U24-HL141727<br>UL1-TR003142                                                                                                                                                                                                                                                                                                                                                                                                                                                                                                                                                                                                                                                                                                                                                                                                                                                                                                                                                                                                                                                                                                                                                                                                                                                                                                                                                                                                                                                                                                                                                                                                                                                                                                                                                                                                                                                                                                                                                                                                                                                                                                                                                                                                                                                                                                                                                                                                                                                                                                                                                                                                                                                                                                                                                                                                                                                                                                                                                                                                                                                                                                                                                                                                                                              |                                                                                                                                          |                                                                                                                                                                                                     |                                                                                                                                              |                                                                                                                                                                                                    |                                                                                                                                            |                                                                                                                                                                                                     |                                                                                                                                         |                                                                                                                                                                                                                                   |                                                                                                                                                 |                                                                                                                                                                         |                                                                                                                                                                                                                                                                                                                                |                                                                                                                                                                                                     |                                                                                                                                                      |                                                                                                                                                                                                     |
|                                                                                                                                                                                                                                                                                                                                | <input type="text" value="Desai, Manisha"/> <input checked="" type="checkbox"/> Save  <a href="#">Desai, Manisha (proxy)</a>                                                                                                                                                                                                                                                                                                                                                                                                                                                                                                                                                                                                                                                                                                                                                                                                                                                                                                                                                                                                                                                                                                                                                                                                                                                                                                                                                                                                                                                                                                                                                                                                                                                                                                                                                                                                                                                                                                                                                                                                                                                                                                                                                                                                                                                                                                                                                                                                                                                                                                                                                                                                                                                                                                                                                                                                                                                                                                                                                                                                                                                                                                                                    |                                                                                                                                          |                                                                                                                                                                                                     |                                                                                                                                              |                                                                                                                                                                                                    |                                                                                                                                            |                                                                                                                                                                                                     |                                                                                                                                         |                                                                                                                                                                                                                                   |                                                                                                                                                 |                                                                                                                                                                         |                                                                                                                                                                                                                                                                                                                                |                                                                                                                                                                                                     |                                                                                                                                                      |                                                                                                                                                                                                     |
| Submitting Author:                                                                                                                                                                                                                                                                                                             | <p><i>primary affiliation</i></p> <ul style="list-style-type: none"> <li>Stanford University - Department of Medicine<br/>1701 Page Mill Room 237 Stanford California 94305-6104<br/>United States</li> </ul>                                                                                                                                                                                                                                                                                                                                                                                                                                                                                                                                                                                                                                                                                                                                                                                                                                                                                                                                                                                                                                                                                                                                                                                                                                                                                                                                                                                                                                                                                                                                                                                                                                                                                                                                                                                                                                                                                                                                                                                                                                                                                                                                                                                                                                                                                                                                                                                                                                                                                                                                                                                                                                                                                                                                                                                                                                                                                                                                                                                                                                                                                                                                      |                                                                                                                                          |                                                                                                                                                                                                     |                                                                                                                                              |                                                                                                                                                                                                    |                                                                                                                                            |                                                                                                                                                                                                     |                                                                                                                                         |                                                                                                                                                                                                                                   |                                                                                                                                                 |                                                                                                                                                                         |                                                                                                                                                                                                                                                                                                                                |                                                                                                                                                                                                     |                                                                                                                                                      |                                                                                                                                                                                                     |
| Authors & Institutions:                                                                                                                                                                                                                                                                                                        | <table border="0"> <tr> <td style="vertical-align: top;">  <a href="#">Hedlin, Haley</a><br/><a href="#">proxy</a> </td> <td style="vertical-align: top;"> <ul style="list-style-type: none"> <li>Stanford University School of Medicine ✓ -<br/>Quantitative Sciences Unit, Department of<br/>Medicine<br/>Palo Alto, California<br/>United States</li> </ul> </td> </tr> <tr> <td style="vertical-align: top;">  <a href="#">Garcia , Ariadna</a><br/><a href="#">proxy</a> </td> <td style="vertical-align: top;"> <ul style="list-style-type: none"> <li>Stanford University School of Medicine ✓ -<br/>Quantitative Sciences Unit Department of<br/>Medicine<br/>Palo Alto, California<br/>United States</li> </ul> </td> </tr> <tr> <td style="vertical-align: top;">  <a href="#">Weng, Yingjie</a><br/><a href="#">proxy</a> </td> <td style="vertical-align: top;"> <ul style="list-style-type: none"> <li>Stanford University School of Medicine ✓ -<br/>Quantitative Sciences Unit, Department of<br/>Medicine<br/>Palo Alto, California<br/>United States</li> </ul> </td> </tr> <tr> <td style="vertical-align: top;">  <a href="#">He, Ziyuan</a><br/><a href="#">proxy</a> </td> <td style="vertical-align: top;"> <ul style="list-style-type: none"> <li>Stanford University School of Medicine ✓ -<br/>Sean N. Parker Center for Allergy and<br/>Asthma Research, Department of<br/>Medicine<br/>Stanford, California<br/>United States</li> </ul> </td> </tr> <tr> <td style="vertical-align: top;">  <a href="#">Sundaram , Vandana</a><br/><a href="#">proxy</a> </td> <td style="vertical-align: top;"> <ul style="list-style-type: none"> <li>Stanford University School of Medicine ✓ -<br/>Quantitative Sciences Unit<br/>Palo Alto, California<br/>United States</li> </ul> </td> </tr> <tr> <td style="vertical-align: top;">  <a href="#">Bunning, Bryan</a><br/><a href="#">proxy</a><br/> <a href="https://orcid.org/0000-0003-3092-0038">https://orcid.org/0000-0003-3092-0038</a> ✓         </td> <td style="vertical-align: top;"> <ul style="list-style-type: none"> <li>Stanford University School of Medicine ✓ -<br/>Quantitative Sciences Unit, Department of<br/>Medicine<br/>Palo Alto, California<br/>United States</li> </ul> </td> </tr> <tr> <td style="vertical-align: top;">  <a href="#">Balasubramanian, Vidhya</a><br/><a href="#">proxy</a> </td> <td style="vertical-align: top;"> <ul style="list-style-type: none"> <li>Stanford University School of Medicine ✓ -<br/>Quantitative Sciences Unit, Department of<br/>Medicine<br/>Palo Alto, California<br/>United States</li> </ul> </td> </tr> </table> |  <a href="#">Hedlin, Haley</a><br><a href="#">proxy</a> | <ul style="list-style-type: none"> <li>Stanford University School of Medicine ✓ -<br/>Quantitative Sciences Unit, Department of<br/>Medicine<br/>Palo Alto, California<br/>United States</li> </ul> |  <a href="#">Garcia , Ariadna</a><br><a href="#">proxy</a> | <ul style="list-style-type: none"> <li>Stanford University School of Medicine ✓ -<br/>Quantitative Sciences Unit Department of<br/>Medicine<br/>Palo Alto, California<br/>United States</li> </ul> |  <a href="#">Weng, Yingjie</a><br><a href="#">proxy</a> | <ul style="list-style-type: none"> <li>Stanford University School of Medicine ✓ -<br/>Quantitative Sciences Unit, Department of<br/>Medicine<br/>Palo Alto, California<br/>United States</li> </ul> |  <a href="#">He, Ziyuan</a><br><a href="#">proxy</a> | <ul style="list-style-type: none"> <li>Stanford University School of Medicine ✓ -<br/>Sean N. Parker Center for Allergy and<br/>Asthma Research, Department of<br/>Medicine<br/>Stanford, California<br/>United States</li> </ul> |  <a href="#">Sundaram , Vandana</a><br><a href="#">proxy</a> | <ul style="list-style-type: none"> <li>Stanford University School of Medicine ✓ -<br/>Quantitative Sciences Unit<br/>Palo Alto, California<br/>United States</li> </ul> |  <a href="#">Bunning, Bryan</a><br><a href="#">proxy</a><br> <a href="https://orcid.org/0000-0003-3092-0038">https://orcid.org/0000-0003-3092-0038</a> ✓ | <ul style="list-style-type: none"> <li>Stanford University School of Medicine ✓ -<br/>Quantitative Sciences Unit, Department of<br/>Medicine<br/>Palo Alto, California<br/>United States</li> </ul> |  <a href="#">Balasubramanian, Vidhya</a><br><a href="#">proxy</a> | <ul style="list-style-type: none"> <li>Stanford University School of Medicine ✓ -<br/>Quantitative Sciences Unit, Department of<br/>Medicine<br/>Palo Alto, California<br/>United States</li> </ul> |
|  <a href="#">Hedlin, Haley</a><br><a href="#">proxy</a>                                                                                                                                                                                       | <ul style="list-style-type: none"> <li>Stanford University School of Medicine ✓ -<br/>Quantitative Sciences Unit, Department of<br/>Medicine<br/>Palo Alto, California<br/>United States</li> </ul>                                                                                                                                                                                                                                                                                                                                                                                                                                                                                                                                                                                                                                                                                                                                                                                                                                                                                                                                                                                                                                                                                                                                                                                                                                                                                                                                                                                                                                                                                                                                                                                                                                                                                                                                                                                                                                                                                                                                                                                                                                                                                                                                                                                                                                                                                                                                                                                                                                                                                                                                                                                                                                                                                                                                                                                                                                                                                                                                                                                                                                                                                                                                                |                                                                                                                                          |                                                                                                                                                                                                     |                                                                                                                                              |                                                                                                                                                                                                    |                                                                                                                                            |                                                                                                                                                                                                     |                                                                                                                                         |                                                                                                                                                                                                                                   |                                                                                                                                                 |                                                                                                                                                                         |                                                                                                                                                                                                                                                                                                                                |                                                                                                                                                                                                     |                                                                                                                                                      |                                                                                                                                                                                                     |
|  <a href="#">Garcia , Ariadna</a><br><a href="#">proxy</a>                                                                                                                                                                                   | <ul style="list-style-type: none"> <li>Stanford University School of Medicine ✓ -<br/>Quantitative Sciences Unit Department of<br/>Medicine<br/>Palo Alto, California<br/>United States</li> </ul>                                                                                                                                                                                                                                                                                                                                                                                                                                                                                                                                                                                                                                                                                                                                                                                                                                                                                                                                                                                                                                                                                                                                                                                                                                                                                                                                                                                                                                                                                                                                                                                                                                                                                                                                                                                                                                                                                                                                                                                                                                                                                                                                                                                                                                                                                                                                                                                                                                                                                                                                                                                                                                                                                                                                                                                                                                                                                                                                                                                                                                                                                                                                                 |                                                                                                                                          |                                                                                                                                                                                                     |                                                                                                                                              |                                                                                                                                                                                                    |                                                                                                                                            |                                                                                                                                                                                                     |                                                                                                                                         |                                                                                                                                                                                                                                   |                                                                                                                                                 |                                                                                                                                                                         |                                                                                                                                                                                                                                                                                                                                |                                                                                                                                                                                                     |                                                                                                                                                      |                                                                                                                                                                                                     |
|  <a href="#">Weng, Yingjie</a><br><a href="#">proxy</a>                                                                                                                                                                                     | <ul style="list-style-type: none"> <li>Stanford University School of Medicine ✓ -<br/>Quantitative Sciences Unit, Department of<br/>Medicine<br/>Palo Alto, California<br/>United States</li> </ul>                                                                                                                                                                                                                                                                                                                                                                                                                                                                                                                                                                                                                                                                                                                                                                                                                                                                                                                                                                                                                                                                                                                                                                                                                                                                                                                                                                                                                                                                                                                                                                                                                                                                                                                                                                                                                                                                                                                                                                                                                                                                                                                                                                                                                                                                                                                                                                                                                                                                                                                                                                                                                                                                                                                                                                                                                                                                                                                                                                                                                                                                                                                                                |                                                                                                                                          |                                                                                                                                                                                                     |                                                                                                                                              |                                                                                                                                                                                                    |                                                                                                                                            |                                                                                                                                                                                                     |                                                                                                                                         |                                                                                                                                                                                                                                   |                                                                                                                                                 |                                                                                                                                                                         |                                                                                                                                                                                                                                                                                                                                |                                                                                                                                                                                                     |                                                                                                                                                      |                                                                                                                                                                                                     |
|  <a href="#">He, Ziyuan</a><br><a href="#">proxy</a>                                                                                                                                                                                        | <ul style="list-style-type: none"> <li>Stanford University School of Medicine ✓ -<br/>Sean N. Parker Center for Allergy and<br/>Asthma Research, Department of<br/>Medicine<br/>Stanford, California<br/>United States</li> </ul>                                                                                                                                                                                                                                                                                                                                                                                                                                                                                                                                                                                                                                                                                                                                                                                                                                                                                                                                                                                                                                                                                                                                                                                                                                                                                                                                                                                                                                                                                                                                                                                                                                                                                                                                                                                                                                                                                                                                                                                                                                                                                                                                                                                                                                                                                                                                                                                                                                                                                                                                                                                                                                                                                                                                                                                                                                                                                                                                                                                                                                                                                                                  |                                                                                                                                          |                                                                                                                                                                                                     |                                                                                                                                              |                                                                                                                                                                                                    |                                                                                                                                            |                                                                                                                                                                                                     |                                                                                                                                         |                                                                                                                                                                                                                                   |                                                                                                                                                 |                                                                                                                                                                         |                                                                                                                                                                                                                                                                                                                                |                                                                                                                                                                                                     |                                                                                                                                                      |                                                                                                                                                                                                     |
|  <a href="#">Sundaram , Vandana</a><br><a href="#">proxy</a>                                                                                                                                                                                | <ul style="list-style-type: none"> <li>Stanford University School of Medicine ✓ -<br/>Quantitative Sciences Unit<br/>Palo Alto, California<br/>United States</li> </ul>                                                                                                                                                                                                                                                                                                                                                                                                                                                                                                                                                                                                                                                                                                                                                                                                                                                                                                                                                                                                                                                                                                                                                                                                                                                                                                                                                                                                                                                                                                                                                                                                                                                                                                                                                                                                                                                                                                                                                                                                                                                                                                                                                                                                                                                                                                                                                                                                                                                                                                                                                                                                                                                                                                                                                                                                                                                                                                                                                                                                                                                                                                                                                                            |                                                                                                                                          |                                                                                                                                                                                                     |                                                                                                                                              |                                                                                                                                                                                                    |                                                                                                                                            |                                                                                                                                                                                                     |                                                                                                                                         |                                                                                                                                                                                                                                   |                                                                                                                                                 |                                                                                                                                                                         |                                                                                                                                                                                                                                                                                                                                |                                                                                                                                                                                                     |                                                                                                                                                      |                                                                                                                                                                                                     |
|  <a href="#">Bunning, Bryan</a><br><a href="#">proxy</a><br> <a href="https://orcid.org/0000-0003-3092-0038">https://orcid.org/0000-0003-3092-0038</a> ✓ | <ul style="list-style-type: none"> <li>Stanford University School of Medicine ✓ -<br/>Quantitative Sciences Unit, Department of<br/>Medicine<br/>Palo Alto, California<br/>United States</li> </ul>                                                                                                                                                                                                                                                                                                                                                                                                                                                                                                                                                                                                                                                                                                                                                                                                                                                                                                                                                                                                                                                                                                                                                                                                                                                                                                                                                                                                                                                                                                                                                                                                                                                                                                                                                                                                                                                                                                                                                                                                                                                                                                                                                                                                                                                                                                                                                                                                                                                                                                                                                                                                                                                                                                                                                                                                                                                                                                                                                                                                                                                                                                                                                |                                                                                                                                          |                                                                                                                                                                                                     |                                                                                                                                              |                                                                                                                                                                                                    |                                                                                                                                            |                                                                                                                                                                                                     |                                                                                                                                         |                                                                                                                                                                                                                                   |                                                                                                                                                 |                                                                                                                                                                         |                                                                                                                                                                                                                                                                                                                                |                                                                                                                                                                                                     |                                                                                                                                                      |                                                                                                                                                                                                     |
|  <a href="#">Balasubramanian, Vidhya</a><br><a href="#">proxy</a>                                                                                                                                                                           | <ul style="list-style-type: none"> <li>Stanford University School of Medicine ✓ -<br/>Quantitative Sciences Unit, Department of<br/>Medicine<br/>Palo Alto, California<br/>United States</li> </ul>                                                                                                                                                                                                                                                                                                                                                                                                                                                                                                                                                                                                                                                                                                                                                                                                                                                                                                                                                                                                                                                                                                                                                                                                                                                                                                                                                                                                                                                                                                                                                                                                                                                                                                                                                                                                                                                                                                                                                                                                                                                                                                                                                                                                                                                                                                                                                                                                                                                                                                                                                                                                                                                                                                                                                                                                                                                                                                                                                                                                                                                                                                                                                |                                                                                                                                          |                                                                                                                                                                                                     |                                                                                                                                              |                                                                                                                                                                                                    |                                                                                                                                            |                                                                                                                                                                                                     |                                                                                                                                         |                                                                                                                                                                                                                                   |                                                                                                                                                 |                                                                                                                                                                         |                                                                                                                                                                                                                                                                                                                                |                                                                                                                                                                                                     |                                                                                                                                                      |                                                                                                                                                                                                     |

 [Cunanan, Kristen](#)  
[proxy](#)

Stanford University School of Medicine ✓ -  
Quantitative Sciences Unit  
Palo Alto, California  
United States

 [Kappahn, Kristopher](#)  
[proxy](#)

Stanford University School of Medicine ✓ -  
Quantitative Sciences Unit, Department of  
Medicine  
Palo Alto, California  
United States

 [Gummidipundi, Santosh](#)  
[proxy](#)

Stanford University School of Medicine ✓ -  
Quantitative Sciences Unit, Department of  
Medicine  
Palo Alto , California  
United States

 [Purington, Natasha](#)  
[proxy](#)

Stanford University School of Medicine ✓ -  
Quantitative Sciences Unit, Department of  
Medicine  
Palo Alto , California  
United States

 [Boulos, Mary](#)  
[proxy](#)

Stanford University School of Medicine ✓ -  
Quantitative Sciences Unit, Department of  
Medicine  
Palo Alto , California  
United States

 [Desai, Manisha](#)  
[proxy](#)  
 <https://orcid.org/0000-0002-6949-2651> ✓

Stanford University School of Medicine ✓ -  
Quantitative Sciences Unit, Department of  
Medicine  
Palo Alto, California  
United States

Contact Author  
(populates the  
##PROLE\_AUTHOR\_..##  
e-mail tags):

Save

Current Contact Author: Desai,  
Manisha  
([proxy](#))

Running Head: Shared infrastructure for trials in a pandemic

Keywords: Platform Protocol ✳, Data Coordinating Center ✳, Efficient Infrastructure ✳, COVID-19 ✳, Pandemic ✳, Data & Safety Monitoring Board ✳, Master Protocol ✳, Core Protocol ✳
